# Supplementary material for: Association between Parkinson’s disease and risk of prostate cancer in different populations: An updated meta-analysis
Source: PubMed Central journal article supplement (PMC5647429; doi:10.1038/s41598-017-13834-x), 2017-10-18
Supplement: 41598_2017_13834_MOESM1_ESM.pdf [file 41598_2017_13834_MOESM1_ESM.pdf]

Supplementary Information for Association between Parkinson's disease and risk of prostate cancer in different populations: An updated meta-analysis

Title of manuscript:

Association between Parkinson's disease and risk of prostate cancer in different populations: An updated meta-analysis

Chunli Chen, MD, Haiping Zheng, MD, Zhiping Hu, MD.

Department of Neurology, Second Xiangya Hospital, Hunan, P.R. China

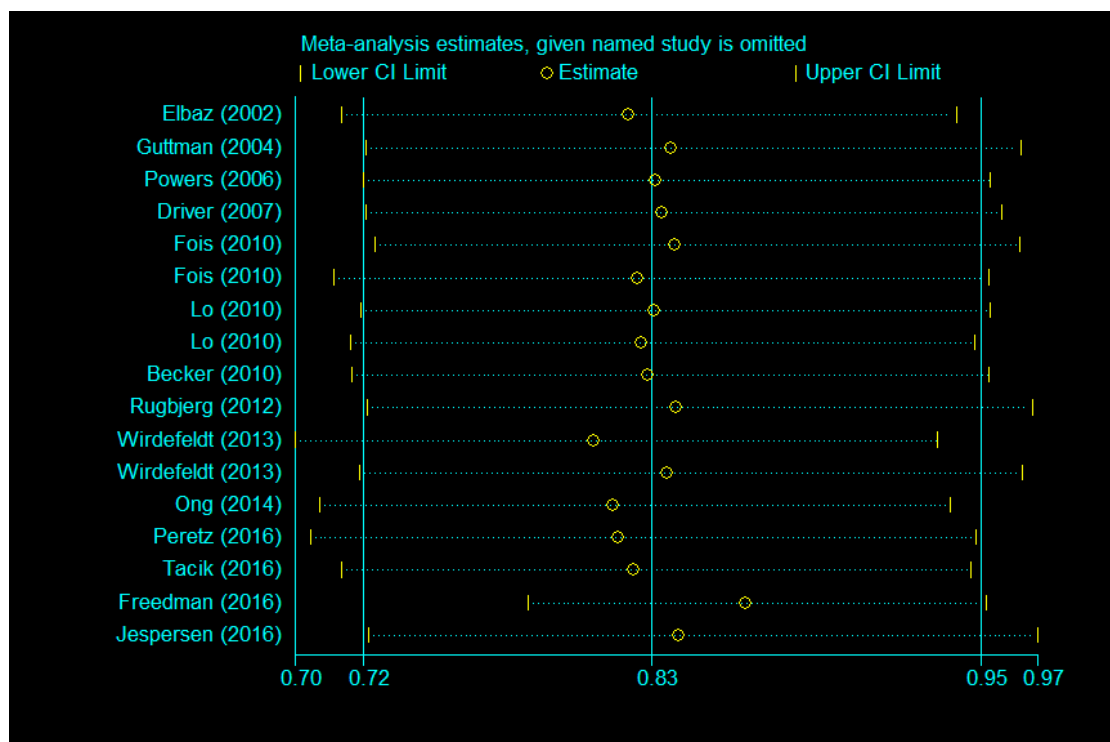

**Figure S1:** Sensitivity analysis for the association between Parkinson's disease and risk of prostate cancer in Western population.

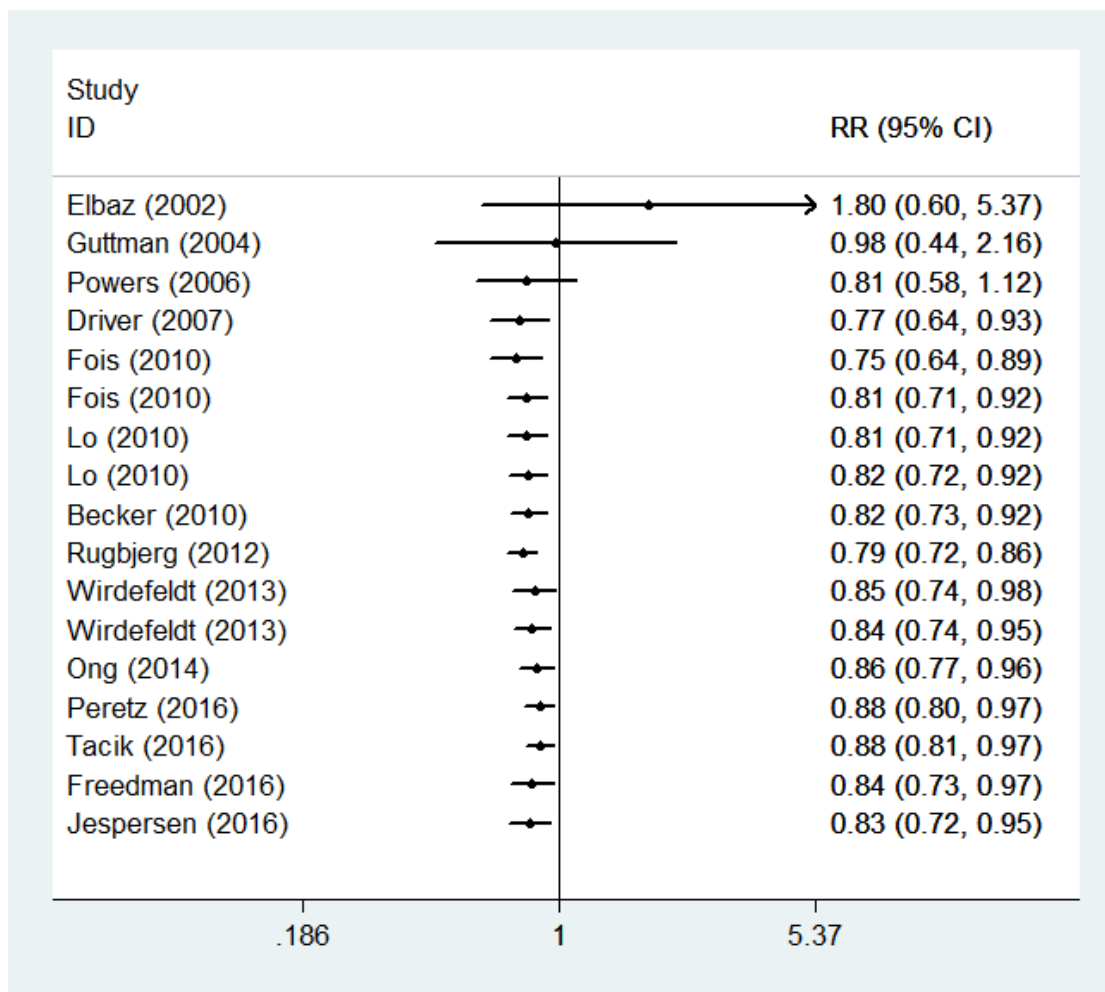

**Figure S2:** Cumulative meta-analysis of the association between Parkinson's disease and risk of prostate cancer in Western population.

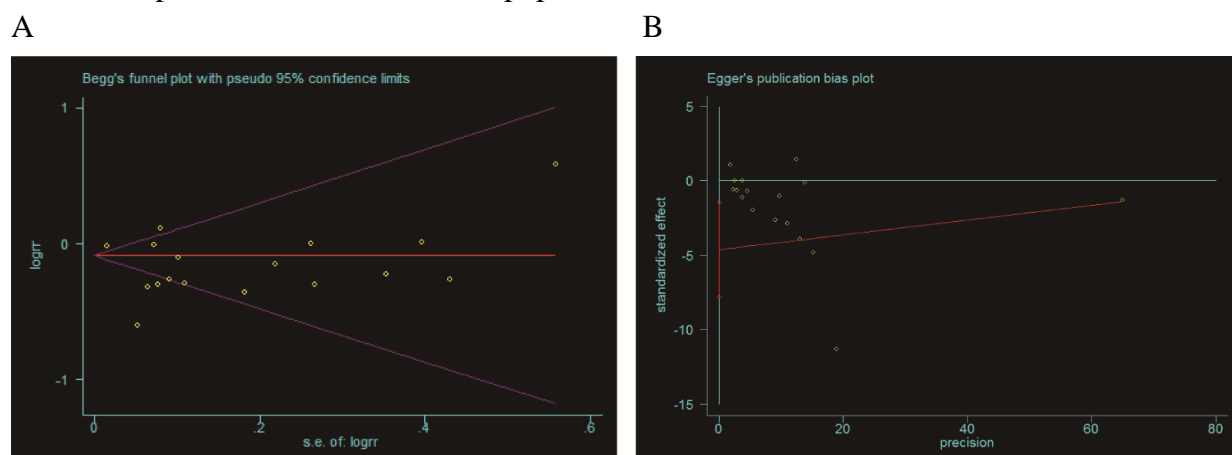

**Figure S3:** Test result for publication bias. (A) Begg's test; (B) Egger's test.

| Study/<br>year     | Selection                          |                                    | Selection<br>of controls | Definiti<br>on of<br>controls | Control for<br>important<br>factors* | Exposure                     |                                                             |                     | NOS<br>Score |
|--------------------|------------------------------------|------------------------------------|--------------------------|-------------------------------|--------------------------------------|------------------------------|-------------------------------------------------------------|---------------------|--------------|
|                    | Adequate<br>definition<br>of cases | Representa<br>tiveness of<br>cases |                          |                               |                                      | Ascertainment<br>of exposure | Same<br>method to<br>ascertain for<br>cases and<br>controls | Nonresponse<br>rate |              |
| Elbaz<br>2002      | 1                                  | 1                                  | 1                        | 1                             | 1                                    | 1                            | 1                                                           | 0                   | 7            |
| Guttman<br>2004    | 1                                  | 0                                  | 1                        | 1                             | 1                                    | 1                            | 1                                                           | 0                   | 6            |
| Powers<br>2006     | 1                                  | 1                                  | 0                        | 1                             | 1                                    | 1                            | 1                                                           | 0                   | 6            |
| Driver<br>2007     | 1                                  | 1                                  | 1                        | 1                             | 1                                    | 0                            | 1                                                           | 0                   | 6            |
| Fois<br>2010       | 1                                  | 0                                  | 1                        | 1                             | 2                                    | 1                            | 1                                                           | 0                   | 7            |
| Lo<br>2010         | 1                                  | 1                                  | 1                        | 1                             | 2                                    | 1                            | 0                                                           | 0                   | 7            |
| Becker<br>2010     | 1                                  | 1                                  | 1                        | 1                             | 1                                    | 0                            | 1                                                           | 0                   | 6            |
| Rugbjerg2<br>012   | 1                                  | 0                                  | 1                        | 1                             | 1                                    | 1                            | 1                                                           | 1                   | 7            |
| Wirdefeldt<br>2013 | 1                                  | 1                                  | 1                        | 1                             | 1                                    | 1                            | 1                                                           | 0                   | 7            |
| Ong<br>2014        | 1                                  | 1                                  | 1                        | 1                             | 1                                    | 1                            | 1                                                           | 1                   | 8            |
| Lin<br>2015        | 1                                  | 1                                  | 1                        | 1                             | 1                                    | 1                            | 1                                                           | 0                   | 7            |
| Peretz<br>2016     | 1                                  | 1                                  | 1                        | 0                             | 1                                    | 1                            | 1                                                           | 1                   | 7            |
| Tacik<br>2016      | 1                                  | 1                                  | 1                        | 0                             | 0                                    | 1                            | 1                                                           | 0                   | 5            |
| Freedman<br>2016   | 1                                  | 1                                  | 0                        | 0                             | 1                                    | 1                            | 1                                                           | 0                   | 5            |
| Jespersen<br>2016  | 1                                  | 1                                  | 1                        | 1                             | 1                                    | 1                            | 1                                                           | 0                   | 7            |

**Table S1.** The quality of the included studies assessed by NOS.\*: a maximum of two stars can be allotted in this category, one for age, sex, the other for other important controlled factors.
